# Supplementary material for: 2-Pyridylselenenyl versus 2-Pyridyltellurenyl Halides: Symmetrical Chalcogen Bonding in the Solid State and Reactivity towards Nitriles
Source: MDPI journal article supplement (doi:10.3390/sym13122350), 2021-12-07
Supplement: s1 [file s1]

# Supporting Information

## 2-Pyridylselenenyl versus 2-Pyridyltellurenyl Halides: Symmetrical Chalcogen Bonding in the Solid State and Reactivity towards Nitriles

Ivan Buslov,<sup>1</sup> Alexander S. Novikov,<sup>2</sup> Victor N. Khrustalev,<sup>1,6</sup> Mariya V. Grudova,<sup>1</sup> Alexey S. Kubasov,<sup>3</sup> Zhanna V. Matsulevich,<sup>4</sup> Alexander V. Borisov,<sup>4</sup> Julia M. Lukyanova,<sup>4</sup> Maria M. Grishina,<sup>1</sup> Anatoly A. Kirichuk,<sup>1</sup> Tatiyana V. Serebryanskaya,<sup>7</sup> Andreii S. Kritchenkov,<sup>1</sup> and Alexander G. Tskhovrebov<sup>1,5,\*</sup>

*1 Peoples' Friendship University of Russia, 6 Miklukho-Maklaya Street, Moscow, Russian Federation; tskhovrebov-ag@rudn.ru*

*2 Saint-Petersburg State University, Universitetskaya Nab. 7/9, Saint Petersburg, Russian Federation; a.s.novikov@spbu.ru*

*3 Kurnakov Institute of General and Inorganic Chemistry, Russian Academy of Sciences, Leninsky Prosp. 31, Moscow, Russian Federation; fobosax@mail.ru*

*4 R.E. Alekseev Nizhny Novgorod State Technical University, Minin St., 24, Nizhny Novgorod, Russian Federation; avb1955@rambler.ru*

*5 N.N. Semenov Federal Research Center for Chemical Physics, Russian Academy of Sciences, Ul. Kosygina 4, Moscow, Russian Federation; tskhovrebov-ag@rudn.ru*

*6 N.D. Zelinsky Institute of Organic Chemistry, Russian Academy of Sciences, 47 Leninsky Prosp., Moscow, Russian Federation; vnkhrustalev@gmail.com*

*7 Research Institute for Physical Chemical problems, Belarusian State University, 14 Leningradskaya str., 220006 Minsk, Belarus; serebryanskaya.t@gmail.com*

**Table S1.** Cartesian atomic coordinates for model supramolecular associates.

| Atom      | X         | Y         | Z         |
|-----------|-----------|-----------|-----------|
| <b>16</b> |           |           |           |
| Te        | 2.119556  | 4.845298  | 10.163529 |
| Te        | 1.796645  | 7.659256  | 12.554535 |
| Br        | 0.529569  | 2.655909  | 10.184077 |
| Br        | 3.778382  | 8.498676  | 14.163216 |
| N         | 0.260422  | 7.073247  | 10.895785 |
| N         | 3.200416  | 6.889989  | 10.016914 |
| C         | 0.359046  | 6.030088  | 10.060947 |
| C         | -0.660722 | 5.743178  | 9.147176  |
| H         | -0.574755 | 5.014293  | 8.544083  |
| C         | -1.797580 | 6.534254  | 9.130541  |
| H         | -2.501628 | 6.350996  | 8.519620  |
| C         | -1.896611 | 7.596484  | 10.015283 |
| H         | -2.672239 | 8.143770  | 10.028167 |
| C         | -0.848802 | 7.845250  | 10.878172 |
| H         | -0.908346 | 8.579939  | 11.476372 |
| C         | 3.121113  | 7.890858  | 10.910300 |
| C         | 3.880923  | 9.046790  | 10.748356 |
| H         | 3.799396  | 9.763236  | 11.367104 |
| C         | 4.757563  | 9.143809  | 9.677369  |
| H         | 5.296478  | 9.918300  | 9.565002  |
| C         | 4.839401  | 8.092358  | 8.770936  |
| H         | 5.436006  | 8.136307  | 8.033624  |
| C         | 4.041970  | 6.988666  | 8.959790  |
| H         | 4.082101  | 6.276366  | 8.332071  |
| Te        | -2.765259 | 8.991398  | 14.299393 |
| Te        | -2.442348 | 11.805356 | 11.908387 |
| Br        | -1.175272 | 6.802009  | 14.278844 |
| Br        | -4.424084 | 12.644776 | 10.299706 |
| N         | -0.906125 | 11.219347 | 13.567136 |
| N         | -3.846119 | 11.036089 | 14.446008 |
| C         | -1.004749 | 10.176188 | 14.401974 |
| C         | 0.015019  | 9.889278  | 15.315746 |
| H         | -0.070948 | 9.160393  | 15.918839 |
| C         | 1.151877  | 10.680354 | 15.332381 |
| H         | 1.855925  | 10.497096 | 15.943302 |
| C         | 1.250908  | 11.742584 | 14.447639 |
| H         | 2.026537  | 12.289870 | 14.434755 |
| C         | 0.203099  | 11.991350 | 13.584750 |
| H         | 0.262644  | 12.726039 | 12.986550 |
| C         | -3.766816 | 12.036958 | 13.552622 |
| C         | -4.526625 | 13.192890 | 13.714566 |
| H         | -4.445099 | 13.909336 | 13.095817 |
| C         | -5.403265 | 13.289909 | 14.785553 |

|          |           |           |           |
|----------|-----------|-----------|-----------|
| H        | -5.942181 | 14.064400 | 14.897919 |
| C        | -5.485104 | 12.238458 | 15.691986 |
| H        | -6.081709 | 12.282407 | 16.429298 |
| C        | -4.687672 | 11.134766 | 15.503132 |
| H        | -4.727804 | 10.422466 | 16.130851 |
| Te       | 7.347641  | 8.991398  | 14.299393 |
| Te       | 7.670552  | 11.805356 | 11.908387 |
| Br       | 8.937628  | 6.802009  | 14.278844 |
| Br       | 5.688816  | 12.644776 | 10.299706 |
| N        | 9.206775  | 11.219347 | 13.567136 |
| N        | 6.266781  | 11.036089 | 14.446008 |
| C        | 9.108151  | 10.176188 | 14.401974 |
| C        | 10.127919 | 9.889278  | 15.315746 |
| H        | 10.041952 | 9.160393  | 15.918839 |
| C        | 11.264777 | 10.680354 | 15.332381 |
| H        | 11.968825 | 10.497096 | 15.943302 |
| C        | 11.363808 | 11.742584 | 14.447639 |
| H        | 12.139437 | 12.289870 | 14.434755 |
| C        | 10.315999 | 11.991350 | 13.584750 |
| H        | 10.375544 | 12.726039 | 12.986550 |
| C        | 6.346084  | 12.036958 | 13.552622 |
| C        | 5.586275  | 13.192890 | 13.714566 |
| H        | 5.667801  | 13.909336 | 13.095817 |
| C        | 4.709635  | 13.289909 | 14.785553 |
| H        | 4.170719  | 14.064400 | 14.897919 |
| C        | 4.627796  | 12.238458 | 15.691986 |
| H        | 4.031191  | 12.282407 | 16.429298 |
| C        | 5.425228  | 11.134766 | 15.503132 |
| H        | 5.385096  | 10.422466 | 16.130851 |
| <b>1</b> |           |           |           |
| Se       | 3.820285  | 4.758591  | 9.025811  |
| Cl       | 3.826054  | 4.858254  | 11.427810 |
| N        | 5.720536  | 2.922429  | 8.098761  |
| C        | 5.543673  | 3.899422  | 9.000170  |
| C        | 6.585222  | 4.323289  | 9.814120  |
| H        | 6.437286  | 4.983336  | 10.480984 |
| C        | 7.839335  | 3.772078  | 9.641193  |
| H        | 8.566471  | 4.052662  | 10.184821 |
| C        | 8.029464  | 2.794534  | 8.654315  |
| H        | 8.891833  | 2.429128  | 8.494308  |
| C        | 6.945101  | 2.374931  | 7.923846  |
| H        | 7.058273  | 1.685310  | 7.281829  |
| Se       | 4.055710  | 1.919466  | 7.089820  |
| Cl       | 2.197232  | 1.011470  | 5.941841  |
| N        | 3.883756  | 4.705332  | 6.886283  |
| C        | 3.880659  | 3.578145  | 6.142894  |

|    |           |           |           |
|----|-----------|-----------|-----------|
| C  | 3.780453  | 3.635993  | 4.763451  |
| H  | 3.783708  | 2.836893  | 4.248645  |
| C  | 3.675958  | 4.862809  | 4.143298  |
| H  | 3.603362  | 4.917198  | 3.197167  |
| C  | 3.678212  | 6.023859  | 4.916502  |
| H  | 3.601033  | 6.877980  | 4.509029  |
| C  | 3.794200  | 5.903688  | 6.280043  |
| H  | 3.812105  | 6.691158  | 6.810751  |
| Se | 1.264239  | 7.408214  | 10.850889 |
| Cl | 1.258469  | 7.308550  | 8.448889  |
| N  | -0.636012 | 9.244375  | 11.777938 |
| C  | -0.459149 | 8.267382  | 10.876530 |
| C  | -1.500698 | 7.843515  | 10.062579 |
| H  | -1.352762 | 7.183468  | 9.395716  |
| C  | -2.754811 | 8.394726  | 10.235507 |
| H  | -3.481948 | 8.114142  | 9.691879  |
| C  | -2.944940 | 9.372270  | 11.222385 |
| H  | -3.807309 | 9.737676  | 11.382392 |
| C  | -1.860577 | 9.791873  | 11.952853 |
| H  | -1.973750 | 10.481494 | 12.594871 |
| Se | 1.028814  | 10.247339 | 12.786880 |
| Cl | 2.887292  | 11.155334 | 13.934858 |
| N  | 1.200768  | 7.461472  | 12.990417 |
| C  | 1.203865  | 8.588659  | 13.733806 |
| C  | 1.304071  | 8.530811  | 15.113249 |
| H  | 1.300816  | 9.329911  | 15.628055 |
| C  | 1.408566  | 7.303996  | 15.733402 |
| H  | 1.481162  | 7.249606  | 16.679533 |
| C  | 1.406312  | 6.142946  | 14.960198 |
| H  | 1.483491  | 5.288824  | 15.367670 |
| C  | 1.290324  | 6.263116  | 13.596656 |
| H  | 1.272419  | 5.475646  | 13.065949 |
| 15 |           |           |           |
| Se | 15.645786 | 1.475732  | 7.258900  |
| N  | 13.894193 | 1.575956  | 7.831312  |
| N  | 15.036598 | 2.010098  | 9.783204  |
| C  | 16.149623 | 1.872631  | 9.007358  |
| C  | 11.665934 | 0.884415  | 9.861586  |
| H  | 11.943279 | 0.044852  | 9.514756  |
| C  | 10.002792 | 2.245755  | 10.924613 |
| H  | 9.139720  | 2.339723  | 11.310048 |
| C  | 17.415117 | 1.999577  | 9.571640  |
| H  | 18.195087 | 1.904606  | 9.038939  |
| C  | 12.107717 | 3.219242  | 10.277398 |
| H  | 12.686453 | 3.971640  | 10.235784 |
| C  | 15.132562 | 2.249963  | 11.129023 |

|    |           |           |           |
|----|-----------|-----------|-----------|
| H  | 14.347173 | 2.320702  | 11.659041 |
| C  | 17.513291 | 2.264691  | 10.912092 |
| H  | 18.369245 | 2.368016  | 11.311057 |
| C  | 10.419770 | 1.009958  | 10.448145 |
| H  | 9.851058  | 0.252882  | 10.524315 |
| C  | 13.808565 | 1.843875  | 9.075658  |
| C  | 12.517056 | 1.984849  | 9.776537  |
| C  | 16.356766 | 2.385325  | 11.700297 |
| H  | 16.430970 | 2.560672  | 12.631182 |
| C  | 10.838826 | 3.334265  | 10.838426 |
| H  | 10.546495 | 4.176423  | 11.166295 |
| Cl | 18.430674 | 1.377190  | 6.483867  |
| Cl | 14.794062 | -1.377190 | 9.777838  |
| Se | 17.578950 | -1.475732 | 9.002805  |
| N  | 19.330543 | -1.575956 | 8.430393  |
| N  | 18.188138 | -2.010098 | 6.478501  |
| C  | 17.075113 | -1.872631 | 7.254347  |
| C  | 21.558802 | -0.884415 | 6.400119  |
| H  | 21.281457 | -0.044852 | 6.746949  |
| C  | 23.221944 | -2.245755 | 5.337092  |
| H  | 24.085016 | -2.339723 | 4.951657  |
| C  | 15.809619 | -1.999577 | 6.690065  |
| H  | 15.029649 | -1.904606 | 7.222766  |
| C  | 21.117019 | -3.219242 | 5.984307  |
| H  | 20.538283 | -3.971640 | 6.025921  |
| C  | 18.092174 | -2.249963 | 5.132682  |
| H  | 18.877564 | -2.320702 | 4.602664  |
| C  | 15.711445 | -2.264691 | 5.349613  |
| H  | 14.855491 | -2.368016 | 4.950648  |
| C  | 22.804966 | -1.009958 | 5.813560  |
| H  | 23.373678 | -0.252882 | 5.737390  |
| C  | 19.416171 | -1.843875 | 7.186047  |
| C  | 20.707680 | -1.984849 | 6.485168  |
| C  | 16.867970 | -2.385325 | 4.561408  |
| H  | 16.793766 | -2.560672 | 3.630523  |
| C  | 22.385910 | -3.334265 | 5.423279  |
| H  | 22.678241 | -4.176423 | 5.095410  |

**Table S2.** Crystallographic parameters, data collection and structure refinement details for **15** and **16**.

| Compound                                    | <b>15</b>                                                      | <b>16</b>                                                                     |
|---------------------------------------------|----------------------------------------------------------------|-------------------------------------------------------------------------------|
| Empirical formula                           | C <sub>12</sub> H <sub>9</sub> ClN <sub>2</sub> Se             | C <sub>10</sub> H <sub>8</sub> Br <sub>2</sub> N <sub>2</sub> Te <sub>2</sub> |
| Formula weight                              | 295.62                                                         | 571.18                                                                        |
| Temperature/K                               | 120.0                                                          | 100(2)                                                                        |
| Crystal system                              | monoclinic                                                     | monoclinic                                                                    |
| Space group                                 | P2 <sub>1</sub> /c                                             | P2 <sub>1</sub> /n                                                            |
| a/Å                                         | 20.5842(10)                                                    | 10.1129(2)                                                                    |
| b/Å                                         | 7.0136(3)                                                      | 8.2922(2)                                                                     |
| c/Å                                         | 18.0982(10)                                                    | 16.7458(3)                                                                    |
| $\alpha$ /°                                 | 90                                                             | 90                                                                            |
| $\beta$ /°                                  | 116.035(2)                                                     | 103.1210(10)                                                                  |
| $\gamma$ /°                                 | 90                                                             | 90                                                                            |
| Volume/Å <sup>3</sup>                       | 2347.7(2)                                                      | 1367.61(5)                                                                    |
| Z                                           | 8                                                              | 4                                                                             |
| $\rho_{\text{calc}}/\text{cm}^3$            | 1.673                                                          | 2.774                                                                         |
| $\mu/\text{mm}^{-1}$                        | 3.398                                                          | 10.085                                                                        |
| F(000)                                      | 1168.0                                                         | 1024.0                                                                        |
| Radiation                                   | MoK $\alpha$ ( $\lambda$ = 0.71073)                            | MoK $\alpha$ ( $\lambda$ = 0.71073)                                           |
| 2 $\Theta$ range for data collection/°      | 3.996 to 56.564                                                | 4.318 to 65.178                                                               |
| Reflections collected                       | 14484                                                          | 31297                                                                         |
| Independent reflections                     | 5784 [ $R_{\text{int}}$ = 0.0433, $R_{\text{sigma}}$ = 0.0476] | 5002 [ $R_{\text{int}}$ = 0.0407, $R_{\text{sigma}}$ = 0.0258]                |
| Data/restraints/parameters                  | 5784/0/278                                                     | 5002/0/146                                                                    |
| Goodness-of-fit on $F^2$                    | 1.019                                                          | 1.087                                                                         |
| Final R indexes [ $I \geq 2\sigma(I)$ ]     | $R_1$ = 0.0285, $wR_2$ = 0.0555                                | $R_1$ = 0.0214, $wR_2$ = 0.0356                                               |
| Final R indexes [all data]                  | $R_1$ = 0.0425, $wR_2$ = 0.0595                                | $R_1$ = 0.0280, $wR_2$ = 0.0375                                               |
| Largest diff. peak/hole / e Å <sup>-3</sup> | 0.47/-0.40                                                     | 0.63/-0.60                                                                    |

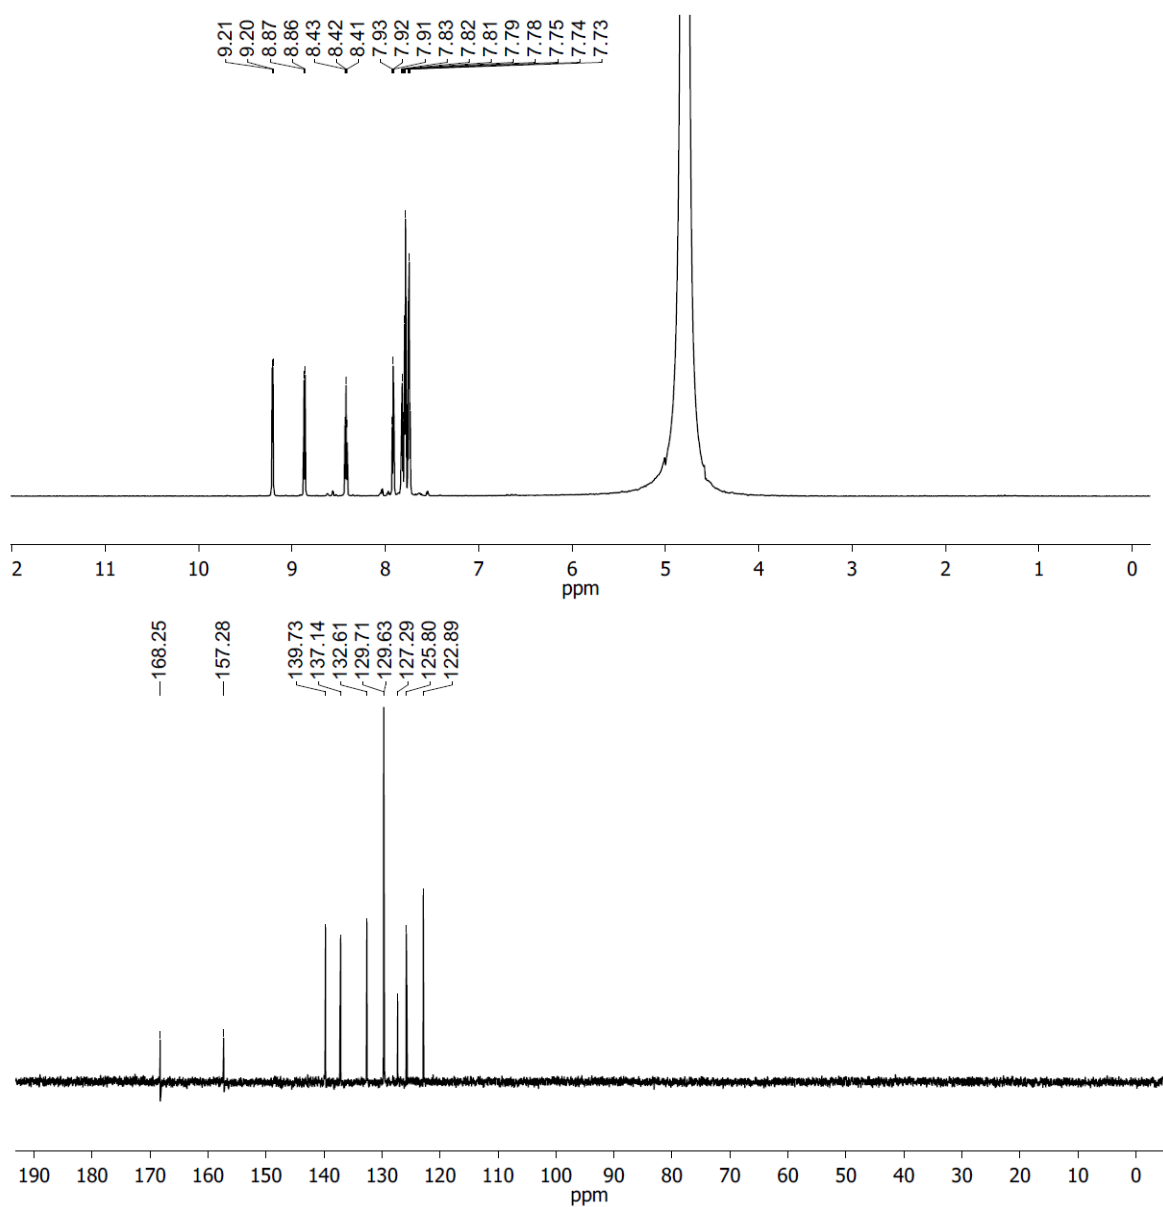

<sup>1</sup>H and <sup>13</sup>C{<sup>1</sup>H} NMR spectra of **15** (D<sub>2</sub>O).
